# Supplementary material for: Decreased high density lipoprotein cholesterol is an independent predictor for persistent organ failure, pancreatic necrosis and mortality in acute pancreatitis
Source: PubMed Central journal article supplement (PMC5556036; doi:10.1038/s41598-017-06618-w), 2017-08-14
Supplement: 41598_2017_6618_MOESM1_ESM.pdf [file 41598_2017_6618_MOESM1_ESM.pdf]

**Title:** Decreased high density lipoprotein cholesterol is an independent predictor for persistent organ failure, pancreatic necrosis and mortality in acute pancreatitis

**Authors:** Yushun Zhang<sup>1\*</sup>, MD, PhD; Heshui Wu<sup>1\*</sup>, MD, PhD; Chunyou Wang<sup>1</sup>, MD, PhD

**Institutional addresses:**

<sup>1</sup>Department of Pancreatic Surgery, Union Hospital, Tongji Medical College, Huazhong University of Science and Technology, 1277 Jiefang Avenue, Wuhan 430022, China

**To whom correspondence should be addressed:**

Yushun Zhang<sup>\*</sup>, MD, PhD; Heshui Wu, MD, PhD<sup>\*</sup>, Department of Pancreatic Surgery, Union Hospital, Tongji Medical College, Huazhong University of Science and Technology, Wuhan 430022, China.

**Email:** Yushun Zhang (zhyshun@hust.edu.cn) and Heshui Wu (heshuiwu@hust.edu.cn)

**Tel:** +86-27-85351621

**Fax:** +86-27-85351669

Supplementary figure

Supplementary figure 1. Flow chart illustrating patient selection

Abbreviations: AP = acute pancreatitis

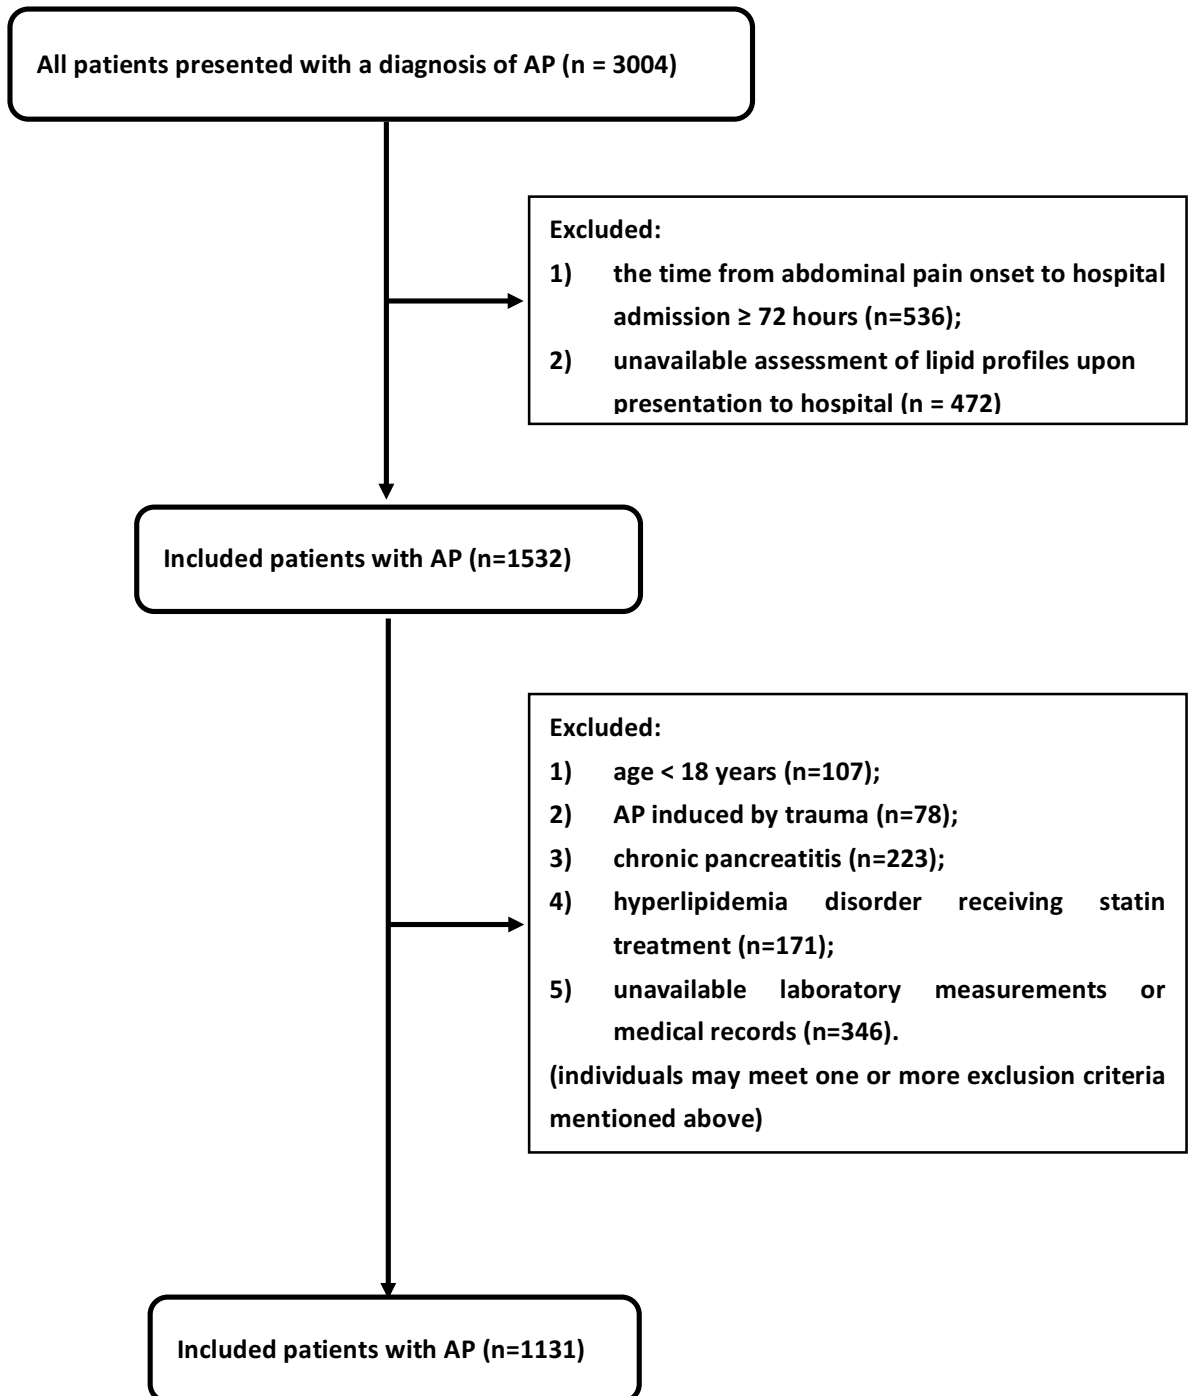

Supplementary tables

Supplementary table 1. Subgroup analysis: incidence of POF according to HDL-C level quartiles

| Variables                                                                     | 1st Quartile              | 2nd Quartile               | 3rd Quartile               | 4th Quartile               | P for trend | P for interaction |
|-------------------------------------------------------------------------------|---------------------------|----------------------------|----------------------------|----------------------------|-------------|-------------------|
| <b>Subgroup (n)</b><br><b>HRa (95% CI)</b><br><b>n (number of POF)</b>        |                           |                            |                            |                            |             |                   |
| <b>Women (n=537)</b><br><b>HRa (95% CI)</b><br><b>n</b>                       | 1.00<br>(reference)<br>32 | 1.32 (0.72,<br>2.42)<br>30 | 0.17 (0.07,<br>0.41)<br>7  | 0.24 (0.12,<br>0.48)<br>14 | < 0.001     | 0.762             |
| <b>Men (n=804)</b><br><b>HRa (95% CI)</b><br><b>n</b>                         | 1.00<br>(reference)<br>76 | 0.17 (0.10,<br>0.29)<br>22 | 0.11 (0.06,<br>0.20)<br>14 | 0.08 (0.04,<br>0.18)<br>8  | < 0.001     |                   |
| <b>Age ≥50 (n=542)</b><br><b>HRa (95% CI)</b><br><b>n</b>                     | 1.00<br>(reference)<br>43 | 0.44 (0.24,<br>0.82)<br>32 | 0.08 (0.04,<br>0.18)<br>12 | 0.11 (0.06,<br>0.23)<br>15 | < 0.001     | 0.001             |
| <b>Age &lt;50 (n=799)</b><br><b>HRa (95% CI)</b><br><b>n</b>                  | 1.00<br>(reference)<br>65 | 0.26 (0.15,<br>0.45)<br>20 | 0.13 (0.06,<br>0.27)<br>9  | 0.10 (0.04,<br>0.22)<br>7  | < 0.001     |                   |
| <b>Daily drinker (n=569)</b><br><b>HRa (95% CI)</b><br><b>n</b>               | 1.00<br>(reference)<br>68 | 0.14 (0.08,<br>0.26)<br>15 | 0.16 (0.08,<br>0.31)<br>11 | 0.04 (0.01,<br>0.16)<br>2  | < 0.001     | 0.181             |
| <b>No daily drinker (n=772)</b><br><b>HRa (95% CI)</b><br><b>n</b>            | 1.00<br>(reference)<br>40 | 0.95 (0.55,<br>1.64)<br>37 | 0.12 (0.06,<br>0.25)<br>10 | 0.21 (0.12,<br>0.39)<br>20 | < 0.001     |                   |
| <b>Current smoker (n=664)</b><br><b>HRa (95% CI)</b><br><b>n</b>              | 1.00<br>(reference)<br>70 | 0.18 (0.10,<br>0.32)<br>19 | 0.08 (0.04,<br>0.18)<br>8  | 0.04 (0.01,<br>0.12)<br>3  | < 0.001     | 0.688             |
| <b>No current smoker (n=677)</b><br><b>HRa (95% CI)</b><br><b>n</b>           | 1.00<br>(reference)<br>38 | 0.83 (0.48,<br>1.44)<br>33 | 0.21 (0.11,<br>0.42)<br>13 | 0.28 (0.15,<br>0.51)<br>19 | < 0.001     |                   |
| <b>Pre-existing co-morbidities (n=410)</b><br><b>HRa (95% CI)</b><br><b>n</b> | 1.00<br>(reference)<br>40 | 0.28 (0.14,<br>0.57)<br>25 | 0.08 (0.04,<br>0.18)<br>11 | 0.17 (0.08,<br>0.36)<br>15 | < 0.001     | < 0.001           |
| <b>No pre-existing co-morbidities (n=410)</b><br><b>HRa (95% CI)</b>          | 1.00                      | 0.35 (0.21,<br>0.57)       | 0.12 (0.06,<br>0.23)       | 0.07 (0.03,<br>0.13)       | < 0.001     |                   |

|                                                                                          |                   |             |             |             |         |         |
|------------------------------------------------------------------------------------------|-------------------|-------------|-------------|-------------|---------|---------|
| <b>n</b>                                                                                 | (reference)<br>68 | 0.58)<br>27 | 0.24)<br>10 | 0.17)<br>7  |         |         |
| <b>Total leukocyte count <math>\geq 12 \times 10^9/L</math><br/>(n=616) HRa (95% CI)</b> | 1.00              | 0.32 (0.17, | 0.38 (0.18, | 0.17 (0.07, | < 0.001 | < 0.001 |
| <b>n</b>                                                                                 | (reference)<br>61 | 0.60)<br>35 | 0.82)<br>17 | 0.40)<br>12 |         |         |
| <b>Total leukocyte count <math>&lt; 12 \times 10^9/L</math><br/>(n=725) HRa (95% CI)</b> | 1.00              | 0.31 (0.14, | 0.08 (0.02, | 0.33 (0.13, | < 0.001 |         |
| <b>n</b>                                                                                 | (reference)<br>47 | 0.68)<br>17 | 0.24)<br>2  | 0.85)<br>10 |         |         |
| <b>Serum glucose <math>\geq 7.1 \text{mmol/L}</math>,<br/>(n=751) HRa (95% CI)</b>       | 1.00              | 0.32 (0.19, | 0.13 (0.07, | 0.20 (0.10, | < 0.001 | < 0.001 |
| <b>n</b>                                                                                 | (reference)<br>90 | 0.57)<br>40 | 0.27)<br>16 | 0.42)<br>18 |         |         |
| <b>Serum glucose <math>&lt; 7.1 \text{mmol/L}</math>,<br/>(n=590) HRa (95% CI)</b>       | 1.00              | 0.41 (0.15, | 0.25 (0.08, | 0.26 (0.07, | < 0.001 |         |
| <b>n</b>                                                                                 | (reference)<br>18 | 1.11)<br>12 | 0.86)<br>5  | 0.95)<br>4  |         |         |
| <b>Serum calcium <math>&lt; 2 \text{mmol/L}</math>,<br/>(n=406)<br/>HRa (95% CI)</b>     | 1.00              | 0.40 (0.23, | 0.19 (0.09, | 0.25 (0.10, | < 0.001 | < 0.001 |
| <b>n</b>                                                                                 | (reference)<br>90 | 0.71)<br>41 | 0.43)<br>13 | 0.64)<br>11 |         |         |
| <b>Serum calcium <math>\geq 2 \text{mmol/L}</math>,<br/>(n=935)<br/>HRa (95% CI)</b>     | 1.00              | 0.25 (0.11, | 0.15 (0.06, | 0.21 (0.09, | < 0.001 |         |
| <b>n</b>                                                                                 | (reference)<br>18 | 0.60)<br>11 | 0.40)<br>8  | 0.53)<br>11 |         |         |

Abbreviations: CI, confident interval; HDL-C, high-density lipoprotein cholesterol; HR, hazard ratio; POF, persistent organ failure. HRa adjustments include sex, age, smoking status, current drinker, pre-existing co-morbidities including history of chronic pulmonary disease, chronic renal disease and cardiovascular disease, total leukocyte count, serum glucose, calcium; but exclude the exposure variable for the individual sub-groups.

**Supplementary table 2. Subgroup analysis: incidence of PNec according to HDL-C level quartiles**

| Variables                                                               | 1st Quartile               | 2nd Quartile               | 3rd Quartile               | 4th Quartile               | P for trend | P for interaction |
|-------------------------------------------------------------------------|----------------------------|----------------------------|----------------------------|----------------------------|-------------|-------------------|
| <b>Subgroup (n)</b><br><b>HRa (95% CI)</b><br><b>n (number of PNec)</b> |                            |                            |                            |                            |             |                   |
| <b>Women (n=537)</b><br><b>HRa (95% CI)</b><br><b>n</b>                 | 1.00<br>(reference)<br>31  | 1.77 (0.97,<br>3.24)<br>35 | 0.20 (0.09,<br>0.47)<br>8  | 0.42 (0.23,<br>0.78)<br>22 | < 0.001     | < 0.001           |
| <b>Men (n=804)</b><br><b>HRa (95% CI)</b><br><b>n</b>                   | 1.00<br>(reference)<br>101 | 0.27 (0.17,<br>0.42)<br>52 | 0.18 (0.11,<br>0.28)<br>35 | 0.14 (0.08,<br>0.25)<br>22 | < 0.001     |                   |
| <b>Age ≥50 (n=542)</b><br><b>HRa (95% CI)</b><br><b>n</b>               | 1.00<br>(reference)<br>37  | 0.69 (0.38,<br>1.28)<br>35 | 0.16 (0.08,<br>0.32)<br>16 | 0.29 (0.15,<br>0.53)<br>25 | < 0.001     | 0.982             |
| <b>Age &lt;50 (n=799)</b><br><b>HRa (95% CI)</b><br><b>n</b>            | 1.00<br>(reference)<br>95  | 0.45 (0.29,<br>0.69)<br>52 | 0.24 (0.14,<br>0.39)<br>27 | 0.15 (0.09,<br>0.27)<br>19 | < 0.001     |                   |
| <b>Daily drinker (n=569)</b><br><b>HRa (95% CI)</b><br><b>n</b>         | 1.00<br>(reference)<br>95  | 0.24 (0.15,<br>0.39)<br>41 | 0.26 (0.15,<br>0.43)<br>29 | 0.16 (0.08,<br>0.31)<br>14 | < 0.001     | < 0.001           |
| <b>No daily drinker (n=772)</b><br><b>HRa (95% CI)</b><br><b>n</b>      | 1.00<br>(reference)<br>37  | 1.50 (0.87,<br>2.56)<br>46 | 0.19 (0.10,<br>0.38)<br>14 | 0.38 (0.22,<br>0.65)<br>30 | < 0.001     |                   |
| <b>Current smoker (n=664)</b><br><b>HRa (95% CI)</b><br><b>n</b>        | 1.00<br>(reference)<br>94  | 0.33 (0.21,<br>0.52)<br>49 | 0.20 (0.12,<br>0.33)<br>30 | 0.14 (0.08,<br>0.26)<br>19 | < 0.001     | < 0.001           |
| <b>No current smoker (n=677)</b><br><b>HRa (95% CI)</b><br><b>n</b>     | 1.00<br>(reference)<br>38  | 1.01 (0.59,<br>1.74)<br>38 | 0.21 (0.11,<br>0.42)<br>13 | 0.38 (0.21,<br>0.67)<br>25 | < 0.001     |                   |
| <b>Pre-existing co-morbidities (n=410) HRa (95% CI)</b><br><b>n</b>     | 1.00<br>(reference)<br>32  | 0.56 (0.28,<br>1.08)<br>28 | 0.20 (0.09,<br>0.41)<br>15 | 0.38 (0.19,<br>0.79)<br>19 | < 0.001     | 0.008             |
| <b>No pre-existing co-morbidities (n=410) HRa (95% CI)</b><br><b>n</b>  | 1.00<br>(reference)        | 0.50 (0.34,<br>0.76)       | 0.20 (0.12,<br>0.33)       | 0.16 (0.09,<br>0.25)       | < 0.001     |                   |

|                                                                                          |                     |                      |                      |                      |         |         |
|------------------------------------------------------------------------------------------|---------------------|----------------------|----------------------|----------------------|---------|---------|
|                                                                                          | 100                 | 59                   | 28                   | 25                   |         |         |
| <b>Total leukocyte count <math>\geq 12 \times 10^9/L</math><br/>(n=616) HRa (95% CI)</b> | 1.00<br>(reference) | 0.73 (0.43,<br>1.22) | 0.61 (0.33,<br>1.14) | 0.55 (0.29,<br>1.05) | 0.003   | < 0.001 |
| <b>n</b>                                                                                 | 73                  | 58                   | 29                   | 26                   |         |         |
| <b>Total leukocyte count <math>&lt; 12 \times 10^9/L</math><br/>(n=725) HRa (95% CI)</b> | 1.00<br>(reference) | 0.37 (0.19,<br>0.71) | 0.16 (0.07,<br>0.34) | 0.32 (0.15,<br>0.68) | < 0.001 |         |
| <b>n</b>                                                                                 | 59                  | 29                   | 14                   | 18                   |         |         |
| <b>Serum glucose <math>\geq 7.1 \text{mmol/L}</math>,<br/>(n=751) HRa (95% CI)</b>       | 1.00<br>(reference) | 0.34 (0.22,<br>0.54) | 0.14 (0.08,<br>0.23) | 0.20 (0.12,<br>0.34) | 0.003   | <0.001  |
| <b>n</b>                                                                                 | 108                 | 63                   | 29                   | 33                   |         |         |
| <b>Serum glucose <math>&lt; 7.1 \text{mmol/L}</math>,<br/>(n=590) HRa (95% CI)</b>       | 1.00<br>(reference) | 1.02 (0.54,<br>1.93) | 0.42 (0.21,<br>0.85) | 0.28 (0.13,<br>0.59) | < 0.001 |         |
| <b>n</b>                                                                                 | 24                  | 24                   | 14                   | 11                   |         |         |
| <b>Serum calcium <math>&lt; 2 \text{mmol/L}</math>,<br/>(n=406)<br/>HRa (95% CI)</b>     | 1.00<br>(reference) | 0.50 (0.29,<br>0.87) | 0.44 (0.22,<br>0.87) | 0.64 (0.28,<br>1.46) | 0.174   | < 0.001 |
| <b>n</b>                                                                                 | 101                 | 51                   | 24                   | 18                   |         |         |
| <b>Serum calcium <math>\geq 2 \text{mmol/L}</math>,<br/>(n=935)<br/>HRa (95% CI)</b>     | 1.00<br>(reference) | 0.67 (0.37,<br>1.21) | 0.24 (0.12,<br>0.47) | 0.34 (0.18,<br>0.64) | < 0.001 |         |
| <b>n</b>                                                                                 | 31                  | 36                   | 19                   | 26                   |         |         |

Abbreviations: CI, confident interval; HDL-C, high-density lipoprotein cholesterol; HR, hazard ratio; PNec, pancreatic necrosis. HRa adjustments include sex, age, smoking status, current drinker, pre-existing co-morbidities including history of chronic pulmonary disease, chronic renal disease and cardiovascular disease, total leukocyte count, serum glucose, calcium; but exclude the exposure variable for the individual sub-groups.

Supplementary table 3. Subgroup analysis: in-hospital mortality according to HDL-C level quartiles

| Variables                                                                            | 1st Quartile              | 2nd Quartile            | 3rd Quartile           | 4th Quartile           | P for trend | P for interaction |
|--------------------------------------------------------------------------------------|---------------------------|-------------------------|------------------------|------------------------|-------------|-------------------|
| <b>Subgroup (n)</b><br><b>HRa (95% CI)</b><br><b>n (number of in-hospital death)</b> |                           |                         |                        |                        |             |                   |
| <b>Women (n=537)</b><br><b>HRa (95% CI)</b><br><b>n</b>                              | 1.00<br>(reference)<br>16 | 1.35 (0.63, 2.89)<br>16 | -<br>0                 | 0.16 (0.05, 0.48)<br>4 | < 0.001     | 0.207             |
| <b>Men (n=804)</b><br><b>HRa (95% CI)</b><br><b>n</b>                                | 1.00<br>(reference)<br>26 | 0.12 (0.04, 0.36)<br>4  | 0.27 (0.12, 0.60)<br>8 | 0.09 (0.02, 0.37)<br>2 | < 0.001     |                   |
| <b>Age ≥50 (n=542)</b><br><b>HRa (95% CI)</b><br><b>n</b>                            | 1.00<br>(reference)<br>22 | 0.63 (0.31, 1.28)<br>18 | 0.08 (0.03, 0.25)<br>4 | 0.13 (0.05, 0.34)<br>6 | < 0.001     | < 0.001           |
| <b>Age &lt;50 (n=799)</b><br><b>HRa (95% CI)</b><br><b>n</b>                         | 1.00<br>(reference)<br>20 | 0.10 (0.02, 0.44)<br>2  | 0.24 (0.08, 0.71)<br>4 | -<br>0                 | < 0.001     |                   |
| <b>Daily drinker (n=569)</b><br><b>HRa (95% CI)</b><br><b>n</b>                      | 1.00<br>(reference)<br>22 | 0.08 (0.02, 0.35)<br>2  | 0.37 (0.14, 0.94)<br>6 | -<br>0                 | < 0.001     | 0.574             |
| <b>No daily drinker (n=772)</b><br><b>HRa (95% CI)</b><br><b>n</b>                   | 1.00<br>(reference)<br>20 | 0.93 (0.46, 1.86)<br>18 | 0.06 (0.01, 0.25)<br>2 | 0.15 (0.06, 0.38)<br>6 | < 0.001     |                   |
| <b>Current smoker (n=664)</b><br><b>HRa (95% CI)</b><br><b>n</b>                     | 1.00<br>(reference)<br>20 | 0.19 (0.06, 0.56)<br>4  | 0.21 (0.07, 0.64)<br>4 | -<br>0                 | < 0.001     | 0.019             |
| <b>No current smoker (n=677)</b><br><b>HRa (95% CI)</b><br><b>n</b>                  | 1.00<br>(reference)<br>22 | 0.69 (0.34, 1.39)<br>16 | 0.13 (0.04, 0.37)<br>4 | 0.17 (0.06, 0.42)<br>6 | < 0.001     |                   |
| <b>Pre-existing co-morbidities (n=410) HRa (95% CI)</b><br><b>n</b>                  | 1.00<br>(reference)<br>20 | 0.48 (0.22, 1.04)<br>14 | 0.10 (0.03, 0.31)<br>4 | 0.21 (0.08, 0.57)<br>6 | < 0.001     | < 0.001           |
| <b>No pre-existing co-morbidities (n=410) HRa (95% CI)</b><br><b>n</b>               | 1.00<br>(reference)       | 0.28 (0.11, 0.71)       | 0.19 (0.06, 0.56)      | -<br>0                 | < 0.001     |                   |

|                                                                                          |                     |                       |                       |                       |         |         |  |
|------------------------------------------------------------------------------------------|---------------------|-----------------------|-----------------------|-----------------------|---------|---------|--|
|                                                                                          | 22                  | 6                     | 4                     |                       |         |         |  |
| <b>Total leukocyte count <math>\geq 12 \times 10^9/L</math><br/>(n=616) HRa (95% CI)</b> | 1.00<br>(reference) | 0.64 (0.26,<br>1.56)  | 0.47 (0.14,<br>1.52)  | 0.32 (0.09,<br>1.15)  | 0.035   | 0.002   |  |
| <b>n</b>                                                                                 | 22                  | 16                    | 6                     | 4                     |         |         |  |
| <b>Total leukocyte count <math>&lt; 12 \times 10^9/L</math><br/>(n=725) HRa (95% CI)</b> | 1.00<br>(reference) | 0.23 (0.07,<br>0.80)  | 0.15 (0.03,<br>0.80)  | 0.18 (0.03,<br>0.96)  | < 0.001 |         |  |
| <b>n</b>                                                                                 | 20                  | 4                     | 2                     | 2                     |         |         |  |
| <b>Serum glucose <math>\geq 7.1 \text{mmol/L}</math>,<br/>(n=751) HRa (95% CI)</b>       | 1.00<br>(reference) | 0.39 (0.17,<br>0.87)  | 0.25 (0.09,<br>0.72)  | 0.19 (0.06,<br>0.64)  | 0.035   | < 0.001 |  |
| <b>n</b>                                                                                 | 36                  | 14                    | 6                     | 4                     |         |         |  |
| <b>Serum glucose <math>&lt; 7.1 \text{mmol/L}</math>,<br/>(n=590) HRa (95% CI)</b>       | 1.00<br>(reference) | 1.09 (0.26,<br>4.65)  | 0.46 (0.07,<br>3.16)  | 0.46 (0.07,<br>3.09)  | 0.075   |         |  |
| <b>n</b>                                                                                 | 6                   | 6                     | 2                     | 2                     |         |         |  |
| <b>Serum calcium <math>&lt; 2 \text{mmol/L}</math>,<br/>(n=406)<br/>HRa (95% CI)</b>     | 1.00<br>(reference) | 0.39 (0.19,<br>0.83)  | 0.25 (0.08,<br>0.76)  | 0.10 (0.02,<br>0.48)  | 0.025   | < 0.001 |  |
| <b>n</b>                                                                                 | 40                  | 16                    | 6                     | 2                     |         |         |  |
| <b>Serum calcium <math>\geq 2 \text{mmol/L}</math>,<br/>(n=935)<br/>HRa (95% CI)</b>     | 1.00<br>(reference) | 2.24 (0.26,<br>19.19) | 0.87 (0.07,<br>10.62) | 1.50 (0.14,<br>15.71) | 0.699   |         |  |
| <b>n</b>                                                                                 | 2                   | 4                     | 2                     | 4                     |         |         |  |

Abbreviations: CI, confident interval; HDL-C, high-density lipoprotein cholesterol; HR, hazard ratio.

HRa adjustments include sex, age, smoking status, current drinker, pre-existing co-morbidities including history of chronic pulmonary disease, chronic renal disease and cardiovascular disease, total leukocyte count, serum glucose, calcium; but exclude the exposure variable for the individual sub-groups.



**Supplementary table S4. Receiving operator curve analyses of lipid files and Ranson score in predicting outcomes**

|                              | <b>AUC (95%CI )</b> | <b>Sensitivity</b> | <b>Specificity</b> | <b>PPV</b> | <b>NPV</b> |
|------------------------------|---------------------|--------------------|--------------------|------------|------------|
| <b>POF</b>                   |                     |                    |                    |            |            |
| TG                           | 0.606 (0.562-0.650) | 0.394              | 0.801              | 0.302      | 0.852      |
| T-CHO                        | 0.526 (0.472-0.579) | 0.261              | 0.919              | 0.414      | 0.850      |
| HDL-C                        | 0.778 (0.740-0.815) | 0.729              | 0.704              | 0.350      | 0.922      |
| LDL-C                        | 0.658 (0.615-0.700) | 0.557              | 0.700              | 0.289      | 0.878      |
| TG/HDL-C                     | 0.681 (0.639-0.723) | 0.581              | 0.706              | 0.302      | 0.885      |
| Non-HDL-C                    | 0.533 (0.472-0.579) | 0.305              | 0.875              | 0.348      | 0.852      |
| Ranson score                 | 0.678 (0.638-0.719) | 0.562              | 0.749              | 0.329      | 0.887      |
| <b>PNec</b>                  |                     |                    |                    |            |            |
| TG                           | 0.669 (0.632-0.706) | 0.451              | 0.841              | 0.513      | 0.805      |
| T-CHO                        | 0.565 (0.523-0.607) | 0.297              | 0.918              | 0.572      | 0.779      |
| HDL-C                        | 0.734 (0.700-0.769) | 0.723              | 0.661              | 0.442      | 0.867      |
| LDL-C                        | 0.656 (0.619-0.693) | 0.575              | 0.690              | 0.408      | 0.814      |
| TG/HDL-C                     | 0.717 (0.683-0.752) | 0.598              | 0.749              | 0.469      | 0.834      |
| Non-HDL-C                    | 0.610 (0.570-0.655) | 0.349              | 0.910              | 0.584      | 0.788      |
| Ranson score                 | 0.701 (0.668-0.734) | 0.529              | 0.776              | 0.467      | 0.816      |
| <b>In-hospital mortality</b> |                     |                    |                    |            |            |
| TG                           | 0.550 (0.485-0.615) | 0.947              | 0.216              | 0.080      | 0.983      |
| T-CHO                        | 0.602 (0.515-0.689) | 0.395              | 0.911              | 0.242      | 0.954      |
| HDL-C                        | 0.768 (0.710-0.827) | 0.632              | 0.777              | 0.170      | 0.967      |
| LDL-C                        | 0.678 (0.609-0.747) | 0.658              | 0.652              | 0.120      | 0.964      |
| TG/HDL-C                     | 0.630 (0.567-0.694) | 0.290              | 0.907              | 0.183      | 0.947      |
| Non-HDL-C                    | 0.562 (0.477-0.647) | 0.263              | 0.963              | 0.339      | 0.948      |
| Ranson score                 | 0.745 (0.694-0.795) | 0.724              | 0.723              | 0.158      | 0.973      |

Abbreviations: AUC: area under the curve; CI: confidence intervals; HDL-C, high-density lipoprotein cholesterol; HR, hazard ratio; LDL-C, low-density lipoprotein cholesterol; NPV: negative predictive value; PNec, pancreatic necrosis; POF, persistent organ failure; PPV: positive predictive value; ROC, receiver operating curve; T-CHO, total cholesterol; TG, triglycerides.
